# Supplementary material for: Giant thermal conductivity and strain thermal response of nitrogen substituted diamane: a machine-learning-based prediction
Source: Royal Society of Chemistry journal article supplement (doi:10.1039/d4nr01834f), 2024-01-01
Supplement: d4nr01834f1.pdf [file d4nr01834f1.pdf]

## Supplementary information

# Giant thermal conductivity and strain thermal response of nitrogen substituted diamane: A machine-learning-based prediction

Biao Wang<sup>1,2</sup>, Zhenqiao Huang<sup>3,4</sup>, Xingchun Xu<sup>1,\*</sup>, Saifei Fan<sup>1,2</sup>, Kunlong Zhao<sup>1</sup>, and Jiaqi Zhu<sup>1,2,\*</sup>

### Details of MTPs:

MTPs is a type of local potentials. In this context, the total energy  $E$  of a sample containing  $N$  atoms is the sum of contributions  $\Omega$  from the neighborhoods  $o_i$  of each  $i$ -th atom.

$$E \equiv E^{MTP} = \sum_{i=1}^N \Omega(o_i) \quad (1)$$

The neighborhood of a central atom is defined as a set.

$$o_i = \left( \left\{ r_{i1}, z_i, z_1 \right\}, \dots, \left\{ r_{ij}, z_i, z_j \right\}, \dots, \left\{ r_{iN_{\text{neigh}}}, z_i, z_{N_{\text{neigh}}} \right\} \right) \quad (2)$$

In this context, the  $j$ -th atom is referred to as a neighboring atom within a predefined cutoff radius  $R_{\text{cut}}$  from the  $i$ -th (central) atom.  $z_i$  and  $z_j$  denote the types of the central and neighboring atoms, respectively,  $r_{ij}$  represents the corresponding interatomic vector, and  $N_{\text{neigh}}$  is the number of atoms in the neighborhood. The contribution of each central atom and its associated neighborhood to the total system energy is expressed as:

$$\Omega(u_i) = \sum_{\alpha} \xi_{\alpha} B_{\alpha}(o_i) \quad (3)$$

$B_{\alpha}$  represents a basis function, where  $\xi_{\alpha}$  is an MLIPs parameter. The basis functions are constructed based on all possible contractions of moment tensor descriptors, generating the following scalar:

$$M_{\mu,\nu}(r_i) = \sum_{j=1}^{N_{\text{nei}}} f_{\mu}(r_{ij} | z_i, z_j) r_{ij}^{\otimes \nu} \quad (3)$$

$f_{\mu}(r_{ij} | z_i, z_j)$  is the radial component of potential MLIP, which depends solely on the distance between atoms  $i$  and  $j$  and their atomic types. The radial component is

obtained by multiplying a set of radial basis functions  $\varphi_\beta(|r_{ij}|)$  by a smoothing factor  $(R_{\text{cut}} - |r_{ij}|)^2$ .

$$f_\mu(|r_{ij}|, z_i, z_j) = \sum_\beta c_{\mu, z_i, z_j}^{(\beta)} \varphi_\beta(|r_{ij}|) (R_{\text{cut}} - |r_{ij}|)^2 \quad (4)$$

$c_{\mu, z_i, z_j}^{(\beta)}$  are the radial coefficients (parameters). The MTP parameters of  $\zeta_\alpha$  and  $c_{\mu, z_i, z_j}^{(\beta)}$  are acquired by solving the minimization problem of:

$$\sum_{k=1}^K \left[ w_e (E_k^{\text{AIMD}} - E_k^{\text{MTP}})^2 + w_f \sum_i^N |f_{k,i}^{\text{AIMD}} - f_{k,i}^{\text{MTP}}|^2 + w_s \sum_{i,j=1}^3 |\sigma_{k,ij}^{\text{AIMD}} - \sigma_{k,ij}^{\text{MTP}}|^2 \right] \rightarrow \min \quad (5)$$

### Linearized phonon BTE:

At the temperature  $T$ , the phonon distribution in the crystal obeys the Bose–Einstein distribution in thermodynamic equilibrium state, as follows:

$$f_{\lambda}^0 = \frac{1}{e^{\hbar\omega_{\lambda}/k_B T} - 1} \quad (6)$$

A temperature gradient drives a phonon heat current by diverting phonon distribution from the equilibrium distribution, as follows:

$$f_{\lambda} = f_{\lambda}^0 - \frac{\partial f_{\lambda}^0}{\partial E_{\lambda}} \Psi_{\lambda} = f_{\lambda}^0 + f_{\lambda}^0 (1 + f_{\lambda}^0) \Psi_{\lambda} \quad (7)$$

The resulting non-zero phonon heat flux  $\mathbf{J}$  can be expressed as follows [1]:

$$\mathbf{J} = \frac{1}{NV} \sum_{\lambda} \hbar\omega_{\lambda} \mathbf{v}_{\lambda} f_{\lambda} = \frac{1}{k_B T^2 NV} \sum_{\lambda} f_{\lambda}^0 (1 + f_{\lambda}^0) (\hbar\omega_{\lambda})^2 \mathbf{v}_{\lambda} (\mathbf{F}_{\lambda} \cdot \nabla T) \quad (8)$$

where  $\lambda$  includes the phonon branch index  $p$  and wave vector  $q$ ;  $\omega_{\lambda}$  and  $\mathbf{v}_{\lambda}$  are the angular frequency and group velocity of phonon mode  $\lambda$ , respectively;  $\mathbf{F}_{\lambda}$  is the mean free displacement of phonons;  $N$  is the number of  $q$  points in the first Brillouin zone;  $V$  is the volume of the unit cell; and  $T$  is the temperature.

According to Fourier's law  $\mathbf{J}^{\alpha} = -\sum_{\beta} \kappa^{\alpha\beta} (\nabla T)^{\beta}$ , the coefficient of thermal conductivity can be obtained as follows:

$$\kappa^{\alpha\beta} = \frac{1}{k_B T^2 NV} \sum_{\lambda} f_{\lambda}^0 (1 + f_{\lambda}^0) (\hbar\omega_{\lambda})^2 v_{\lambda}^{\alpha} F_{\lambda}^{\beta} \quad (9)$$

where  $\kappa^{\alpha\beta}$  represents  $\kappa$  corresponding to the heat flow generated in the  $\alpha$  direction by the temperature gradient in the  $\beta$  direction.

The linearized BTE  $\mathbf{F}_{\lambda}$  can then be written as follows [2]:

$$\mathbf{F}_{\lambda} = \tau_{\lambda}^0 (\mathbf{v}_{\lambda} + \Delta_{\lambda}) \quad (10)$$

where  $\Delta_{\lambda}$  represents the effective change in velocity after scattering and  $\tau_{\lambda}^0$  is the lifetime of mode  $\lambda$ , the inverse of which is the scattering rate calculated by Matthiessen's rule [3]. The phonon–phonon (anharmonic) and phonon–isotope scatterings with the natural isotopic distribution of diamond are considered. Total

scattering rates  $1/\tau_\lambda^0$  are determined as follows:

$$\frac{1}{\tau_\lambda^0} = \frac{1}{\tau_\lambda^{\text{anh}}} + \frac{1}{\tau_\lambda^{\text{iso}}} \quad (11)$$

The phonon–phonon scattering rates require the identification of a set of three-phonon scattering processes that satisfy phonon energy and momentum conservation conditions, as follows [4]:

$$\omega_\lambda \pm \omega_{\lambda'} = \omega_{\lambda''} \quad \text{and} \quad \mathbf{q} \pm \mathbf{q}' = \mathbf{q}'' + \mathbf{K} \quad (12)$$

Where  $\lambda$ ,  $\lambda'$ , and  $\lambda''$  represent the three phonons involved;  $\mathbf{K}$  is the reciprocal lattice vector.  $\mathbf{K} = 0$  characterizes momentum-conserving normal processes and  $\mathbf{K} \neq 0$  corresponds to resistive umklapp processes [5]. However, the intrinsic three-phonon scattering rates are treated similarly (“+” represents absorption processes and “−” represents emission processes), as follows:

$$\Gamma_{\lambda\lambda'\lambda''}^+ = \frac{\hbar\pi}{4} \frac{f_0' - f_0''}{\omega_\lambda \omega_{\lambda'} \omega_{\lambda''}} |V_{\lambda\lambda'\lambda''}^+|^2 \delta(\omega_\lambda + \omega_{\lambda'} - \omega_{\lambda''}) \quad (13)$$

$$\Gamma_{\lambda\lambda'\lambda''}^- = \frac{\hbar\pi}{4} \frac{f_0' + f_0'' + 1}{\omega_\lambda \omega_{\lambda'} \omega_{\lambda''}} |V_{\lambda\lambda'\lambda''}^-|^2 \delta(\omega_\lambda - \omega_{\lambda'} - \omega_{\lambda''}) \quad (14)$$

The Dirac distribution  $\delta(\omega_\lambda \pm \omega_{\lambda'} - \omega_{\lambda''})$  enforces the conservation of energy in the absorption and emission processes. The scattering matrix elements  $V_{\lambda\lambda'\lambda''}^\pm$  can be calculated by third-order IFCs, as follows [6]:

$$V_{\lambda\lambda'\lambda''}^\pm = \sum_{i \in \text{u.c.}} \sum_{j,k} \sum_{\alpha\beta\gamma} \Phi_{ijk}^{\alpha\beta\gamma} \frac{e_\lambda^\alpha(i) e_{p', \pm \mathbf{q}'}^\beta(j) e_{p'', -\mathbf{q}''}^\gamma(k)}{\sqrt{M_i M_j M_k}} \quad (15)$$

where  $\Phi_{ijk}^{\alpha\beta\gamma}$  is the anharmonic IFCs matrix. It refers to movement of the two atoms in multiple directions in the supercell, followed by calculation of the Hellmann–Feynman (H–F) force after displacement.

Finally, we obtain the anharmonic scattering rates  $1/\tau_\lambda^{\text{anh}}$  according to the following equation:

$$\frac{1}{\tau_{\lambda}^{\text{anh}}} = \frac{1}{N} \left( \sum_{\lambda'\lambda''}^{+} \Gamma_{\lambda\lambda'\lambda''}^{+} + \sum_{\lambda'\lambda''}^{-} \frac{1}{2} \Gamma_{\lambda\lambda'\lambda''}^{-} \right) \quad (16)$$

In addition to intrinsic three-phonon scattering, elastic scattering of phonons introduced by isotope impurities is present, as follows [7, 8]:

$$\frac{1}{\tau_{\lambda}^{\text{iso}}} = \frac{1}{N} \sum_{\lambda'} \Gamma_{\lambda\lambda'} = \frac{1}{N} \sum_{\lambda'} \frac{\pi\omega^2}{2} \sum_{i \in \text{u.c.}} g(i) \left| \mathbf{e}_{\lambda}^{*}(i) \cdot \mathbf{e}_{\lambda'}(i) \right|^2 \delta(\omega_{\lambda} - \omega_{\lambda'}) \quad (17)$$

where  $g(i) = \sum_s f_s(i) [1 - M_s(i) / \bar{M}(i)]^2$  is the Pearson deviation coefficient of the masses  $M_s(i)$  of isotopes  $s$  of atom  $i$ .

### Convergence tests:

Structural optimization parameter:

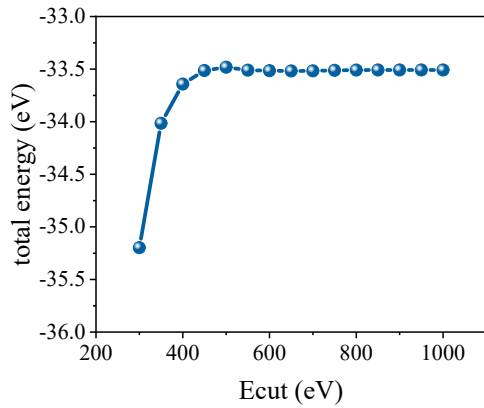

(a) Ecut

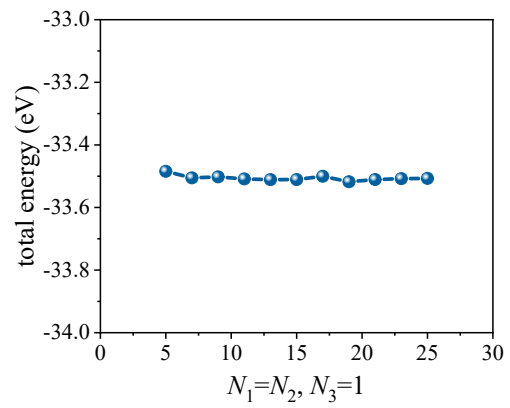

(b)  $k$ -points

Thermal conductivity:

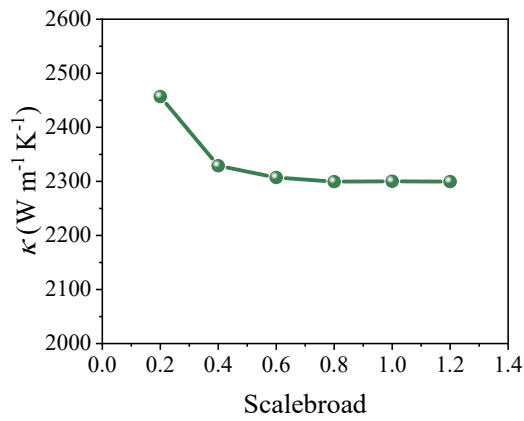

(c) scalebroad

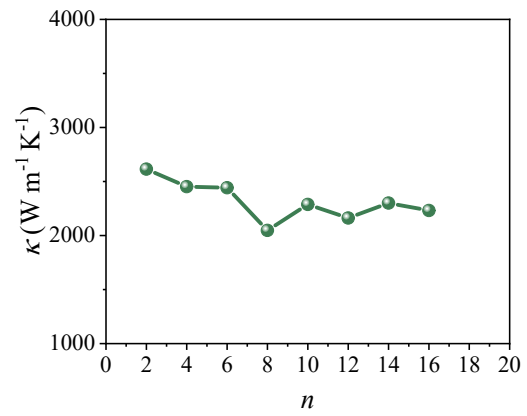

(d) critical atomic number  $n$  of force cutoff

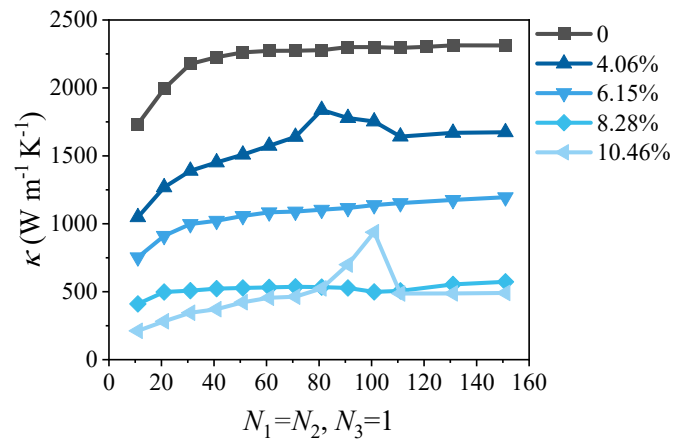

(e)  $q$ -points (zigzag strain)

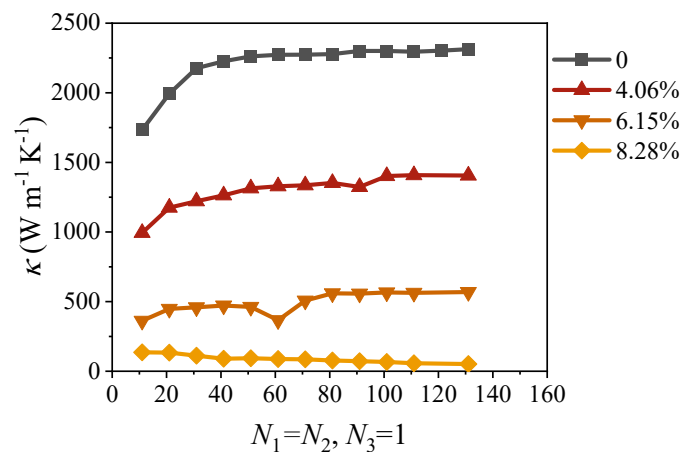

(f)  $q$ -points (armchair strain)

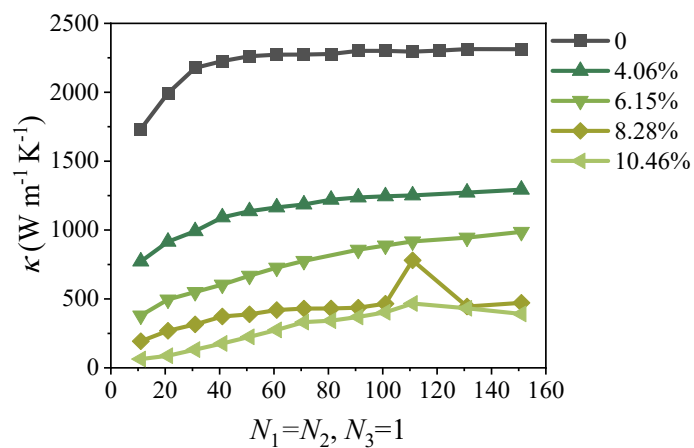

(g)  $q$ -points (biaxial strain)

**Fig. S1.** Convergence test

## Structural parameter:

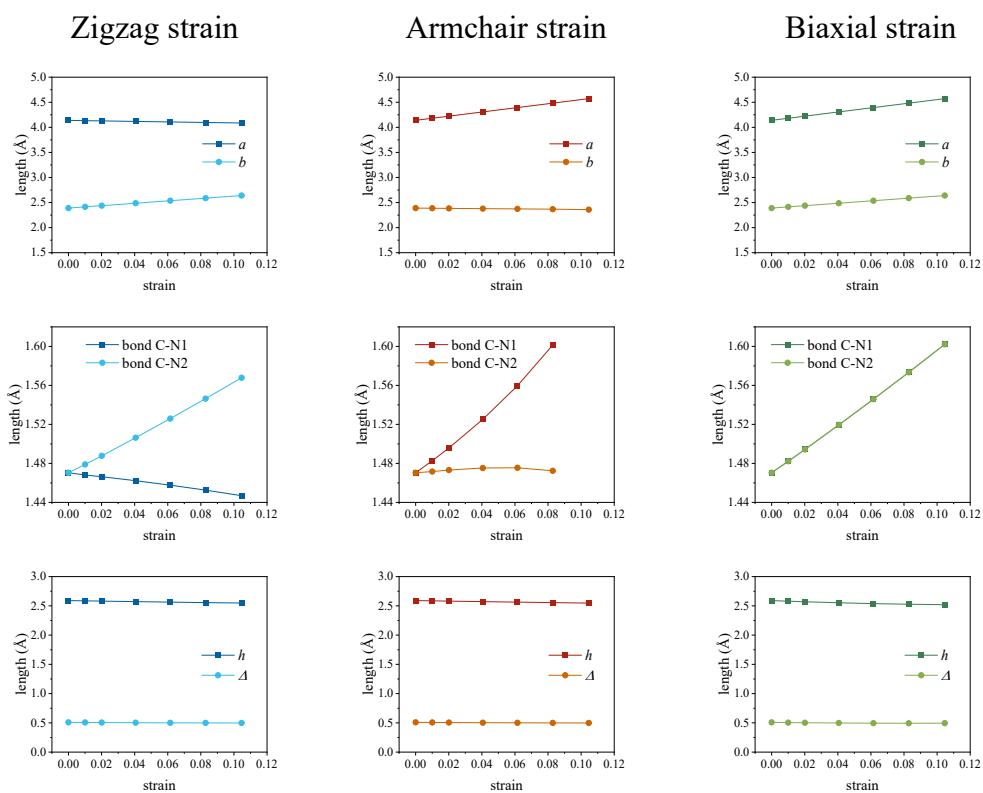

**Fig. S2.** The structural parameters of NCCN during the strain process



## Thermal conductivity:

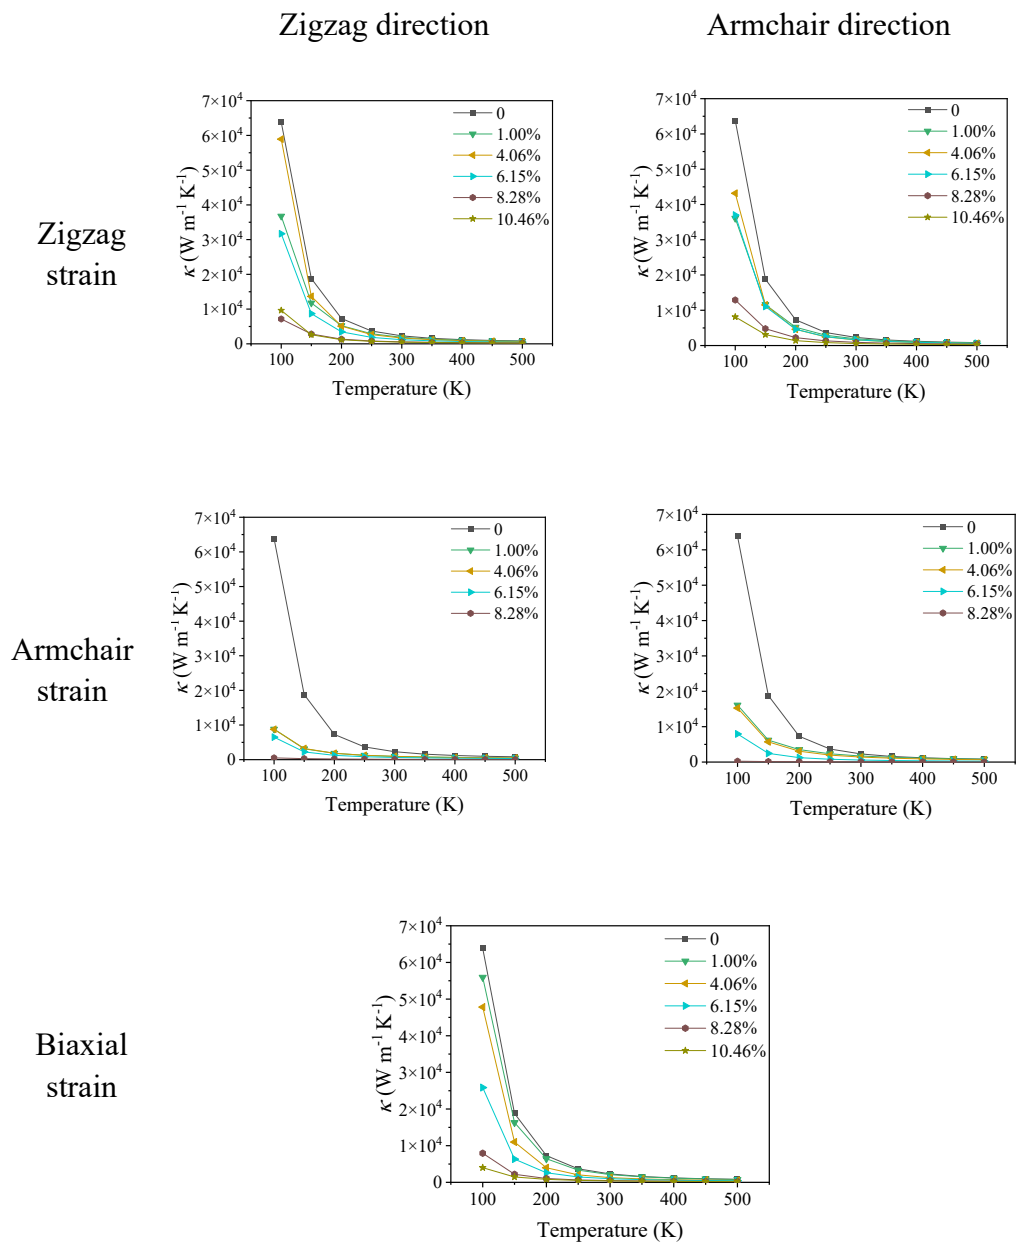

Fig. S3. Change of thermal conductivity with temperature

**Phonon information:**

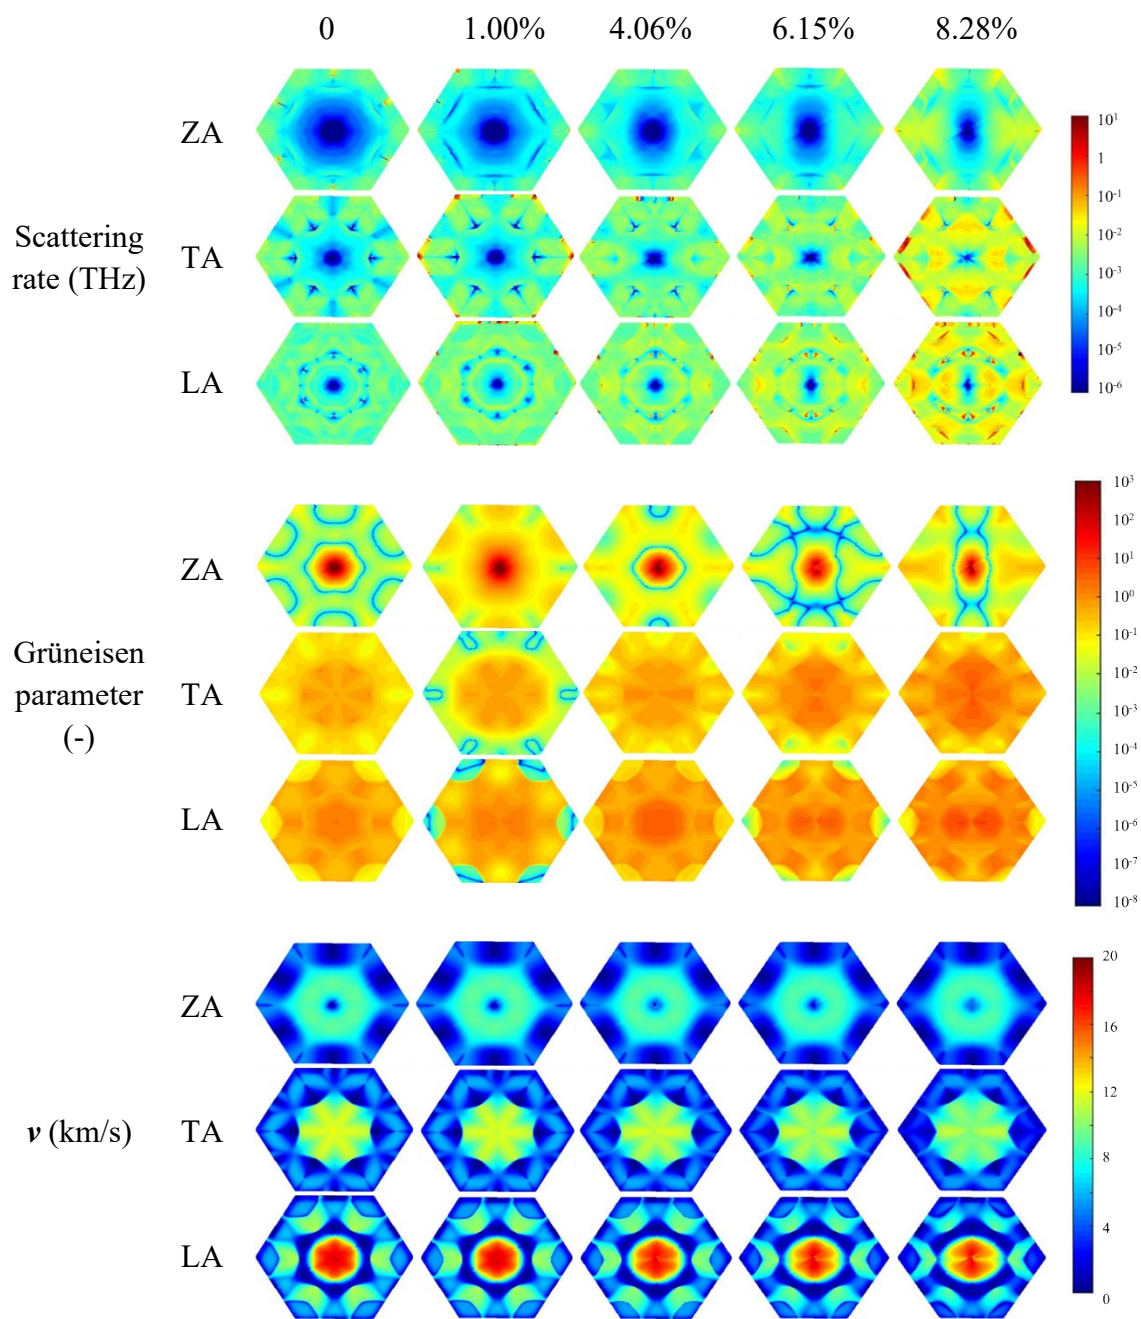

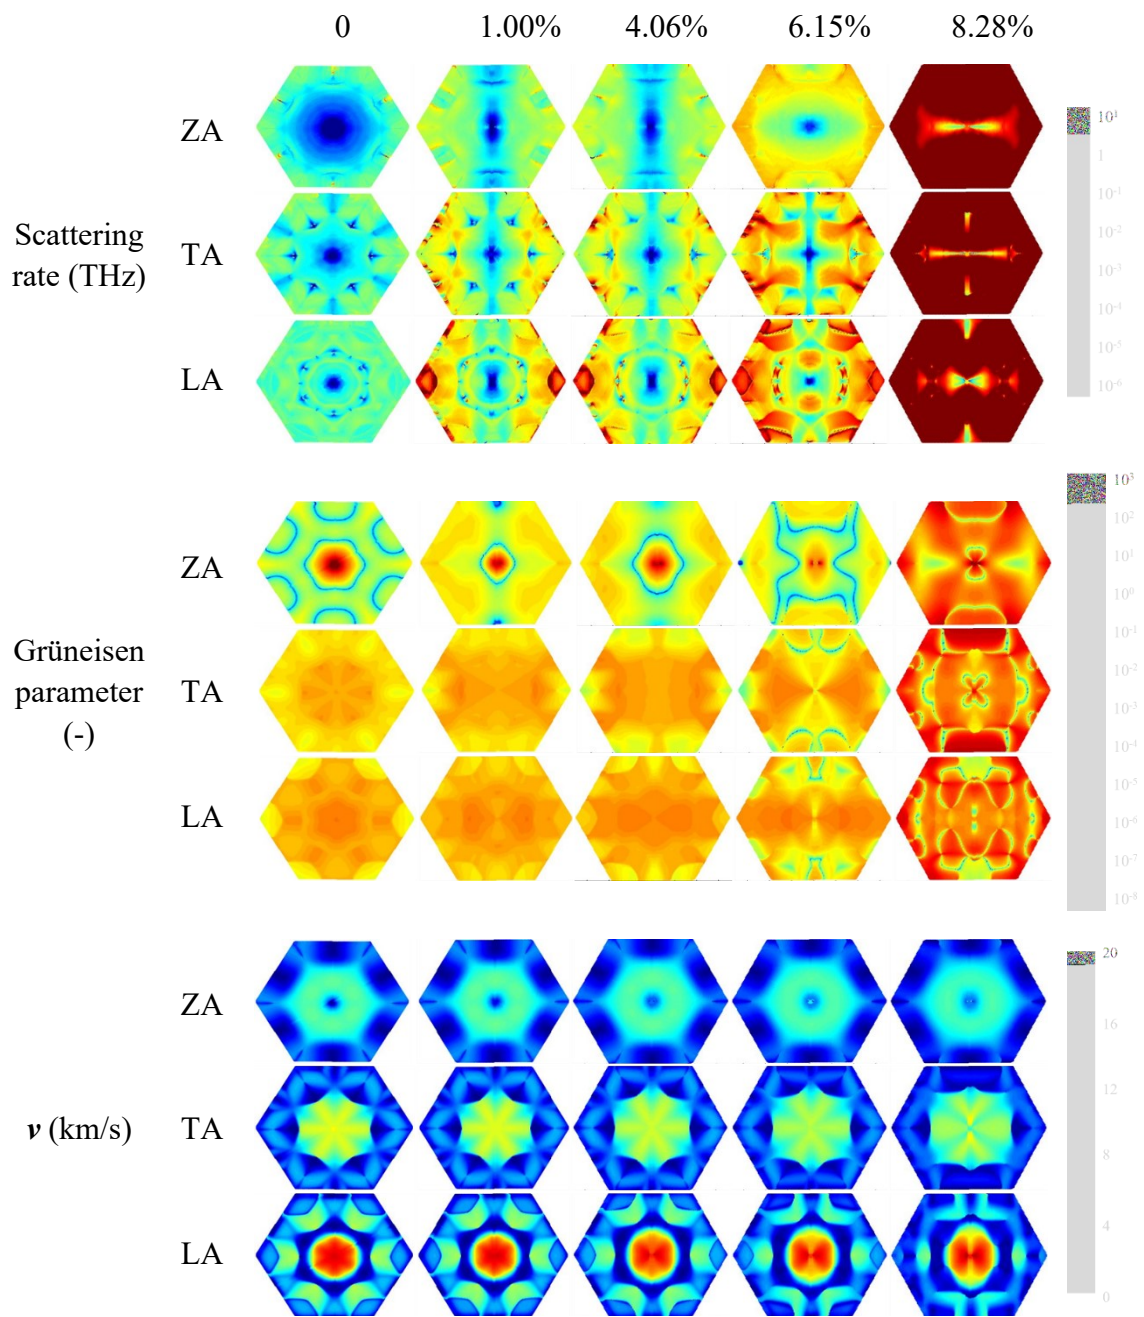

(b) Armchair strain

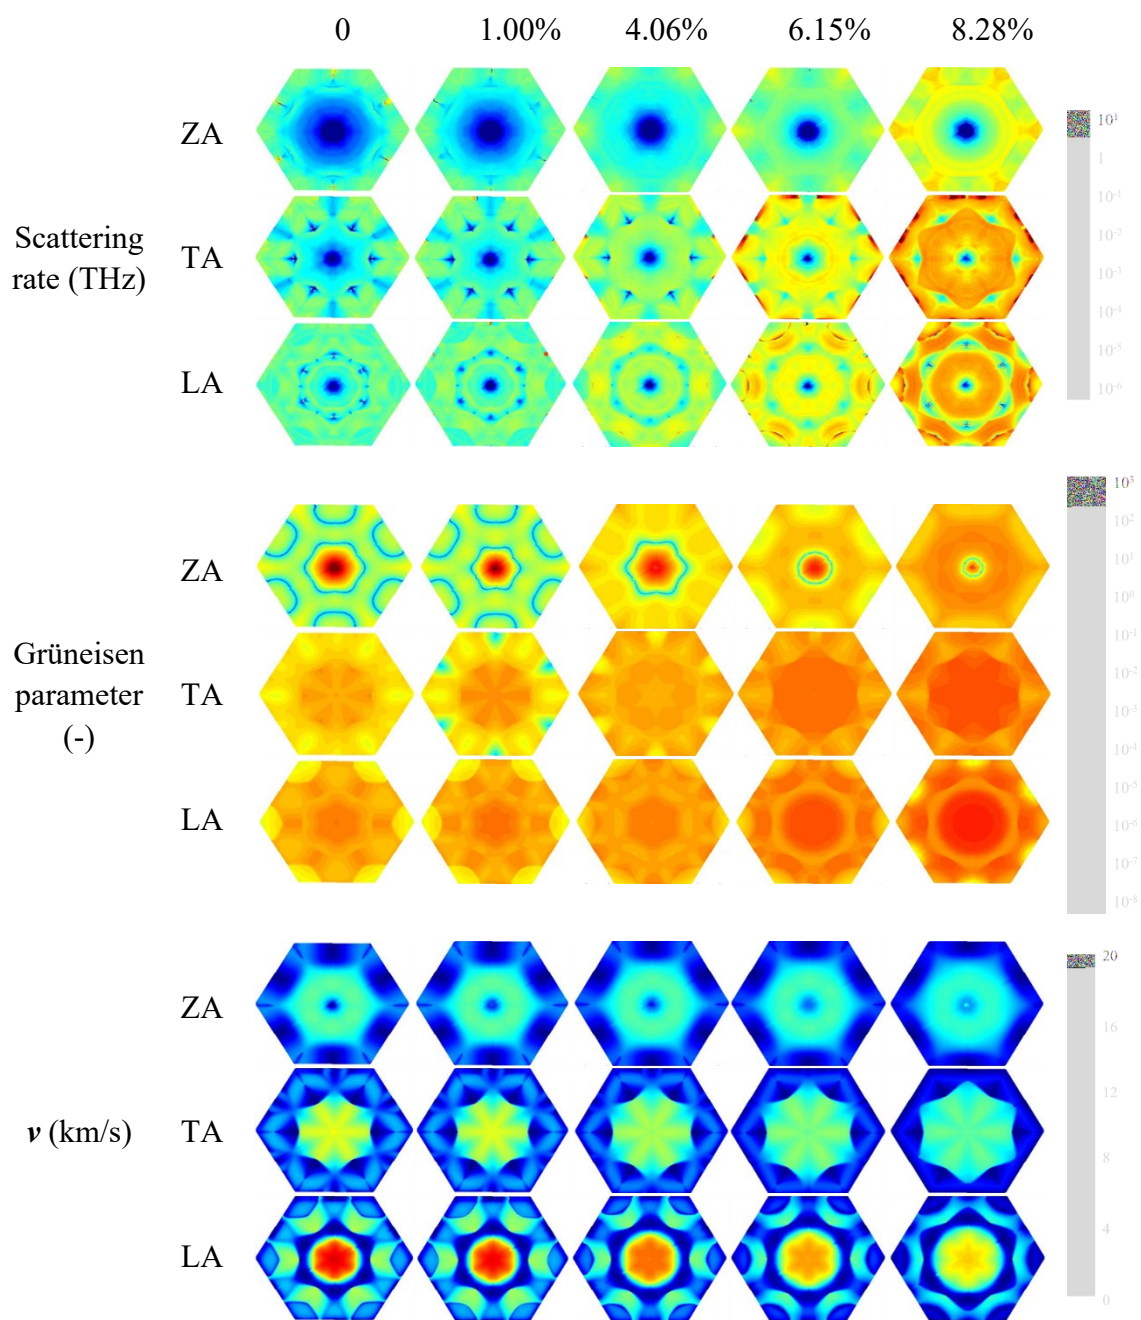

(c) Biaxial strain

**Fig. S4.** Distribution of phonon information (scattering rate, Grüneisen parameter, group velocity) in the first Brillouin zone for NCCN. Grüneisen parameters representing the anharmonic effect of phonons.



## References

- [1] A. Chernatynskiy, S.R. Phillpot, Evaluation of computational techniques for solving the Boltzmann transport equation for lattice thermal conductivity calculations, *Physical Review B* 82, 134301 (2010).  
<https://doi.org/10.1103/PhysRevB.82.134301>.
- [2] W. Li, J. Carrete, N.A. Katcho, N. Mingo, ShengBTE: a solver of the Boltzmann transport equation for phonons, *Computer Physics Communications* 185, 1747 (2014).  
<https://doi.org/10.1016/j.cpc.2014.02.015>.
- [3] G.P. Srivastava, *The Physics of Phonons*, Routledge (1990).  
<https://doi.org/10.1201/9780203736241>.
- [4] D.A. Broido, M. Malorny, G. Birner, N. Mingo, D.A. Stewart, Intrinsic lattice thermal conductivity of semiconductors from first principles, *Applied Physics Letters* 91, 231922 (2007).  
<https://doi.org/10.1063/1.2822891>.
- [5] J.M. Ziman, *Electrons and Phonons: The Theory of Transport Phenomena in Solids*, Oxford University Press (1960).
- [6] L. Lindsay, D.A. Broido, Three-phonon phase space and lattice thermal conductivity in semiconductors, *Journal of Physics: Condensed Matter* 20, 165209 (2008).  
<https://iopscience.iop.org/article/10.1088/0953-8984/20/16/165209/meta>.
- [7] S.I. Tamura, Isotope scattering of dispersive phonons in Ge, *Physical Review B* 27, 858 (1983).  
<https://doi.org/10.1103/PhysRevB.27.858>.
- [8] D.A. Broido, T.L. Reinecke, Lattice thermal conductivity of superlattice structures, *Physical Review B* 70, 081310 (2004).  
<https://doi.org/10.1103/PhysRevB.70.081310>.
